# Supplementary material
Source: PubMed Central journal article supplement (PMC3625945)

**Table S1: Summary of MBD-seq, ChIP-seq, and MNase-seq primary data analysis (related to Figures 1 and 2).**

| Sample                 | # Reads (million) | # Reliable reads* (million) | # Peaks  | Total bp covered by peaks | Ave. width of peak (bp) | Standard deviation | Min. length (bp) | Max. length (bp) |
|------------------------|-------------------|-----------------------------|----------|---------------------------|-------------------------|--------------------|------------------|------------------|
| DNMT1-UD               | 21.6              | 17.1                        | 20717    | 14745674                  | 711.77                  | 403.68             | 268              | 15617            |
| DNMT1-DF               | 21.6              | 17.5                        | 18272    | 12756408                  | 698.14                  | 388.67             | 280              | 15790            |
| DNMT3A-UD              | 23.6              | 19.7                        | 4660     | 3816013                   | 818.89                  | 827.9              | 219              | 19692            |
| DNMT3A-DF              | 24.1              | 18.6                        | 10708    | 9575563                   | 894.24                  | 1048.42            | 345              | 31111            |
| DNMT3B-UD              | 46.9              | 30.5                        | 21285    | 24415676                  | 1147.08                 | 905.52             | 343              | 13970            |
| DNMT3B-DF              | 43.9              | 31.8                        | 6237     | 6914694                   | 1108.66                 | 714.98             | 363              | 10388            |
| DNA-Me UD              | 25.6              | 14.7                        | 175761   | 174028114                 | 990.14                  | 609.34             | 212              | 19703            |
| DNA-Me DF              | 14.9              | 12.3                        | 51636    | 37776142                  | 731.59                  | 336.68             | 214              | 8211             |
| H3K4me3-UD             | 24.1              | 19.7                        | 47178    | 32156382                  | 681.6                   | 528.65             | 166              | 8489             |
| H3K4 me3-DF            | 15.1              | 12.6                        | 23231    | 30699129                  | 1321.47                 | 812.58             | 209              | 11486            |
| H3K9me3-UD             | 28.5              | 22.2                        | 69667    | 65466023                  | 939.7                   | 628.89             | 249              | 22925            |
| H3K9me3 DF             | 28.1              | 21.4                        | 52300    | 45675873                  | 873.34                  | 536.53             | 207              | 15574            |
| H3K27me3-UD            | 22.0              | 17.1                        | 100889   | 87811500                  | 870                     | 734.85             | 231              | 75765            |
| H3K27me3-DF            | 28.1              | 22.8                        | 42912    | 35804188                  | 834.36                  | 464.6              | 241              | 12094            |
| H2AK119Ub-UD           | 20.6              | 16.2                        | 67787    | 117211109                 | 1729.11                 | 1295.4             | 500              | 39025            |
| H2AK119Ub-DF           | 46.3              | 36.8                        | 41912    | 68413926                  | 1632.32                 | 1736.64            | 370              | 47113            |
| H3K36me3-UD            | 24.9              | 21.8                        | 27579    | 29289958                  | 1062.04                 | 885.04             | 254              | 28534            |
| H3K36me3-DF            | 24.6              | 21.6                        | 40641    | 44934868                  | 1105.65                 | 975.85             | 362              | 41689            |
| ChIP Input             | 49.6              | 39.1                        |          |                           |                         |                    |                  |                  |
| MBD Input              | 22.4              | 14.4                        |          |                           |                         |                    |                  |                  |
| Nucleosome position-UD | 459.1             | 359.4                       | 9772482  | 1389263260                | 142.16                  | 60.37              | 40               | 650              |
| Nucleosome position-DF | 371.2             | 328.5                       | 10148750 | 1354218680                | 133.43                  | 54.54              | 40               | 640              |
| WA09 (H9) ES DNA-Me    | 95.9              | 65.2                        | 180566   | 104444035                 | 578.43                  | 426.22             | 203              | 24176            |

UD - undifferentiated NCCIT

DF - RA differentiated NCCIT cells at day 7

\*Reliable reads - reads mapped to a single location with a fixed number of mismatches and indels, as described in the Extended Experimental Procedures

**Table S2: Sequences of quantitative RT-PCR primers used in this study (related to Figures 1, 2, S1, and S2).**

| Gene   | Forward                            | Reverse                    |
|--------|------------------------------------|----------------------------|
| HAND1  | AAAGGCTCAGGACCCAAGAA               | CAGCACGTCCATCAGGTAGG       |
| MAP2   | CAGGTGGCGGACGTGTGAAAATTGAGAGT<br>G | CACGCTGGATCTGCCTGGGGACTGTG |
| FOXA2  | TGGGAGCGGTGAAGATGGAAGGGCAC         | TCATGCCAGCGCCCACGTACGACGAC |
| NANOG  | TGAACCTCAGCTACAAACAGGTG            | AACTGCATGCAGGACTGCAGAG     |
| SOX2   | ACAACCTCGGAGATCAGCA                | GCAGCGTGTACTTATCCTTC       |
| OCT4   | CTTGCTGCAGAAGTGGGTGGAGGAA          | CTGCAGTGTGGGTTTCGGGCA      |
| DNMT1  | GAGGCAGATGACGATGAGG                | CAGTCTTGACGGCTTCTCC        |
| DNMT3A | TATTGATGAGCGCACAAAGAGAGC           | GGGTGTTCCAGGGTAACATTGAG    |
| DNMT3B | TGTTTCTGTGTGGAGTGC                 | CAGCAATGGACTCCTCAC         |
| HES7   | GTCTAGGATTGTACTCTC                 | GGGATTTAATAACCACTTT        |
| OTX2   | CTCCAACACAGCCTCCAC                 | CTATAAAGTAGATGTGGCGAGTGA   |
| EVX2   | CATCAAGGTGTGGTTCCA                 | CGTCATCATGTAGGTGTAGA       |
| HOXC5  | GATGACCAAACACTGCACAT               | TAGCGGTAAAGTGGAATT         |
| HOXB8  | GCAATTTCTACGGCTACGA                | CGTACTGCACCAGGTCTG         |
| HOXD1  | CTACCCCAAGTCCGTCTC                 | TTACCTTTCTTAGAGGCATTC      |
| HOXD10 | CTGAGGTCTCCGTGTCCAGT               | TTCTGCCACTCTTTGCAGTG       |
| LEFTY1 | TTCAAGTGGCCGTTTCTG                 | CTCCTTGATGCTGACGAT         |
| EIF4G1 | TATTCCAGCCAACTTGTC                 | CAACAGCCTCCTTCTTAT         |
| ESPNP  | GCAGCCAAAGGAGACTTC                 | CTTGGTTTGGGCATTCACT        |
| ETV2   | CAAATTAGGCTTCTGTTTCC               | TACCTTTCCAGCATGTCT         |
| CROCC  | GAGGTGGAGCTGACACTAG                | GCCCAAGCCTTTCTCCTG         |
| DSP    | AGCAGGATGTACTATTCTC                | GATGGTGTCTGGTTCTG          |
| NADK   | ATCATGCTGTCACCTGAAG                | ATGGCGGATCTCTTGCT          |
| GAPDH  | CTTTGGTATCGTGGAAGG                 | GATGATGTTCTGGAGAGC         |

**Table S3: Sequences of primers used in quantitative ChIP and MBD enrichment experiments****(Related to Figures 1, 2, S2, and S4).**

| <b>Genomic loci</b> | <b>Forward</b>          | <b>Reverse</b>         |
|---------------------|-------------------------|------------------------|
| HAND1               | ACCTGTTTAACCCTTCTG      | GGAGAGGTTGACATCAAA     |
| NANOG               | TGTTATTATCAACTAATCCTCTG | TGTGTCCCTCAACTCAAT     |
| OCT4                | TTGTCTCTTCGAAATCCA      | GGTGTGTATCAACTGCTG     |
| HES7                | GAATCTGTCCGACTCAAC      | TGAATGTAAGTGGCTTAGATAG |
| OTX2                | AGTTCTATCTGTGAAGGA      | AAGTGACTCTTGAAATCG     |
| EVX2                | CCGCTCGTCATTAAGGTA      | ATCTATTTGTCTGCTCTGAAG  |
| HOXC5               | CTTGTGGGAACTATGGAT      | TGGGAAAGTGATGCTTAA     |
| HOXB8               | CAACAAATCAAATACCTTC     | TGACATTTAGAAAGACTC     |
| HOXD1               | CTACCCCAAGTCCGTCTC      | TTACCTTTCTTAGAGGCATTC  |
| HOXD10              | GGCCCCTAGAGCTGAGACTT    | CGGACAACAGCGACATCTAC   |
| LEFTY1-Body         | AATTAGGTGAGGTAAGTTGT    | GATGACTGAACTGCTGAT     |
| EIF4G1-Body         | GGGTTATTAAGTTGGAAT      | ACCATAGGAAGGAAGAAT     |
| ESPNP               | ATAGAGGCGAAGAGAATC      | AGAGAAGAATCACCACAT     |
| ETV2                | TGAGCGATGAACTGAGGA      | GCTTCTTGGGAGTCTAGTC    |
| CROCC-Body          | TTCATCTCTGGCTTAGTG      | CCTTTCCACAACTTCAC      |
| DSP                 | TGAGAAGTGCTATAATACGACAA | TCCAAACAATGCCGCTAA     |
| NADK                | ACGCAGACTACTCAGGAGAA    | ACAACTGGGAGGGATGGT     |
| UBE2B               | CTCAGGGGTGGATTGTTGAC    | TGTGGATTCAAAGACCACGA   |
| PEX13               | GCGTCTAGCAATTCTGTTCC    | GTAGGGTGAGGTGGCAAAC    |
| GPR109A             | GCTGGAGCATTCACTAGG      | TGAAGTCATCTCGGAACAC    |
| OXT                 | TGTGCCAGACCATTAGC       | AAGAGGTTGGTAGTATGATTGG |
| BRDT                | CCCTTTGGCCTTACCAACTT    | GCCCTCCCTGAAGAAAAAC    |

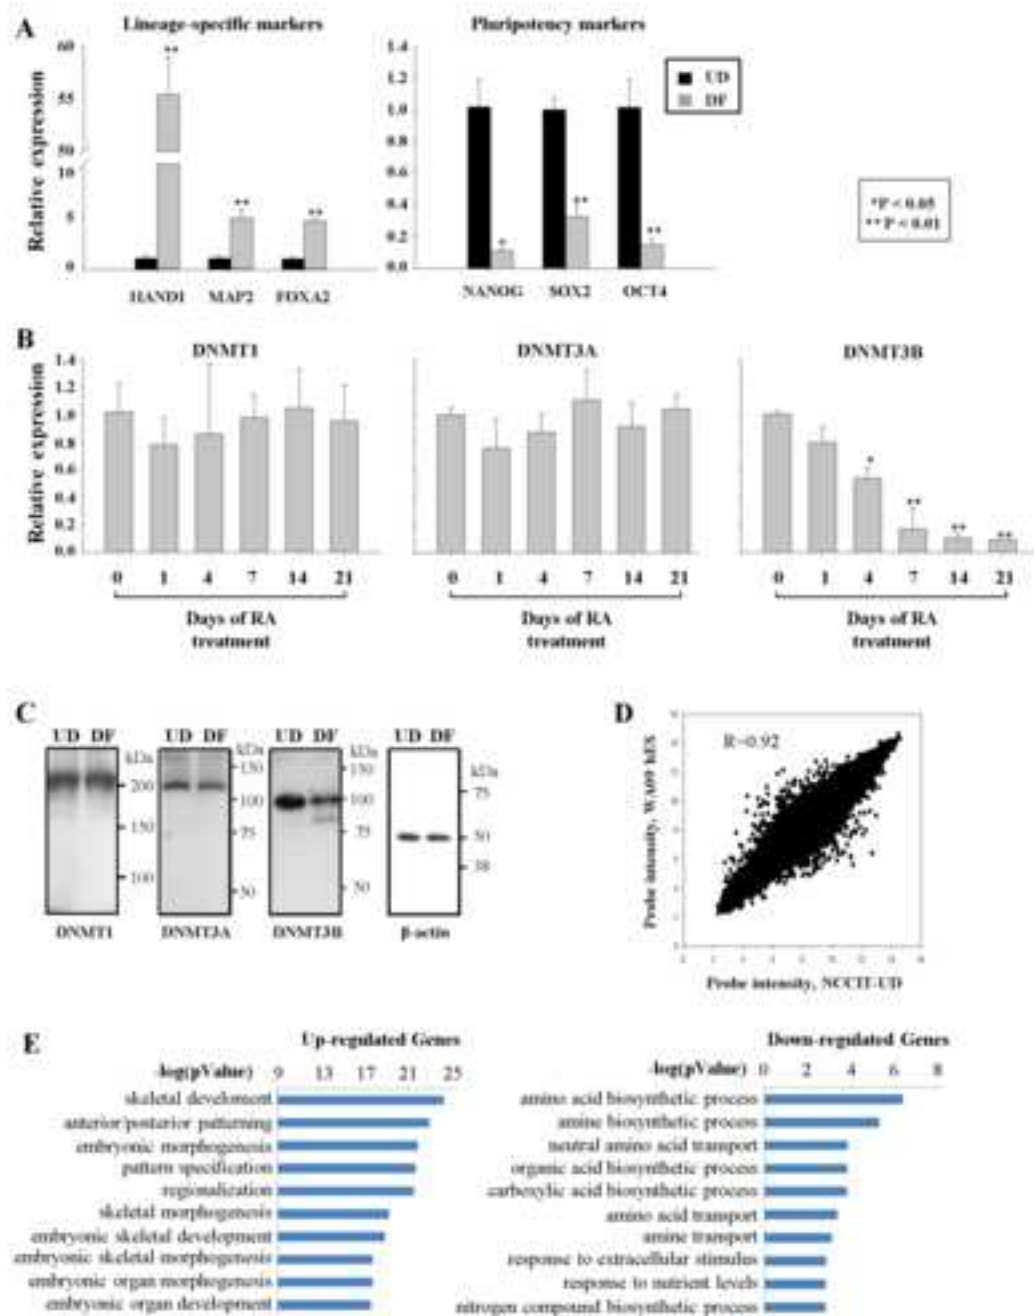

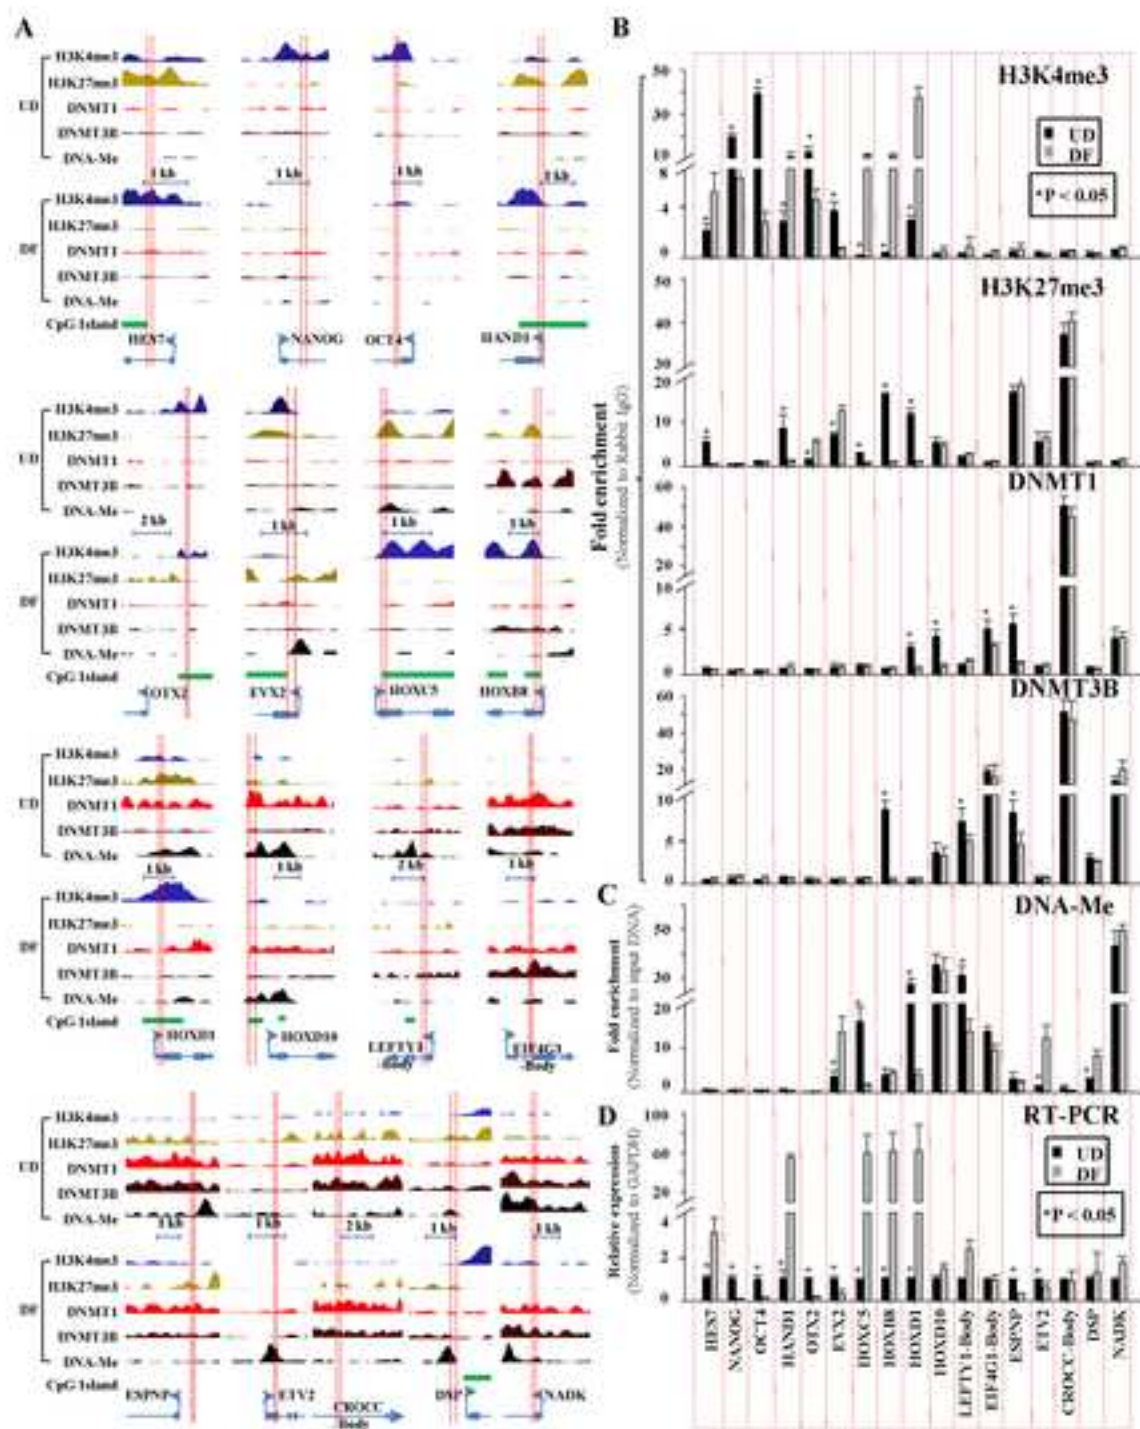

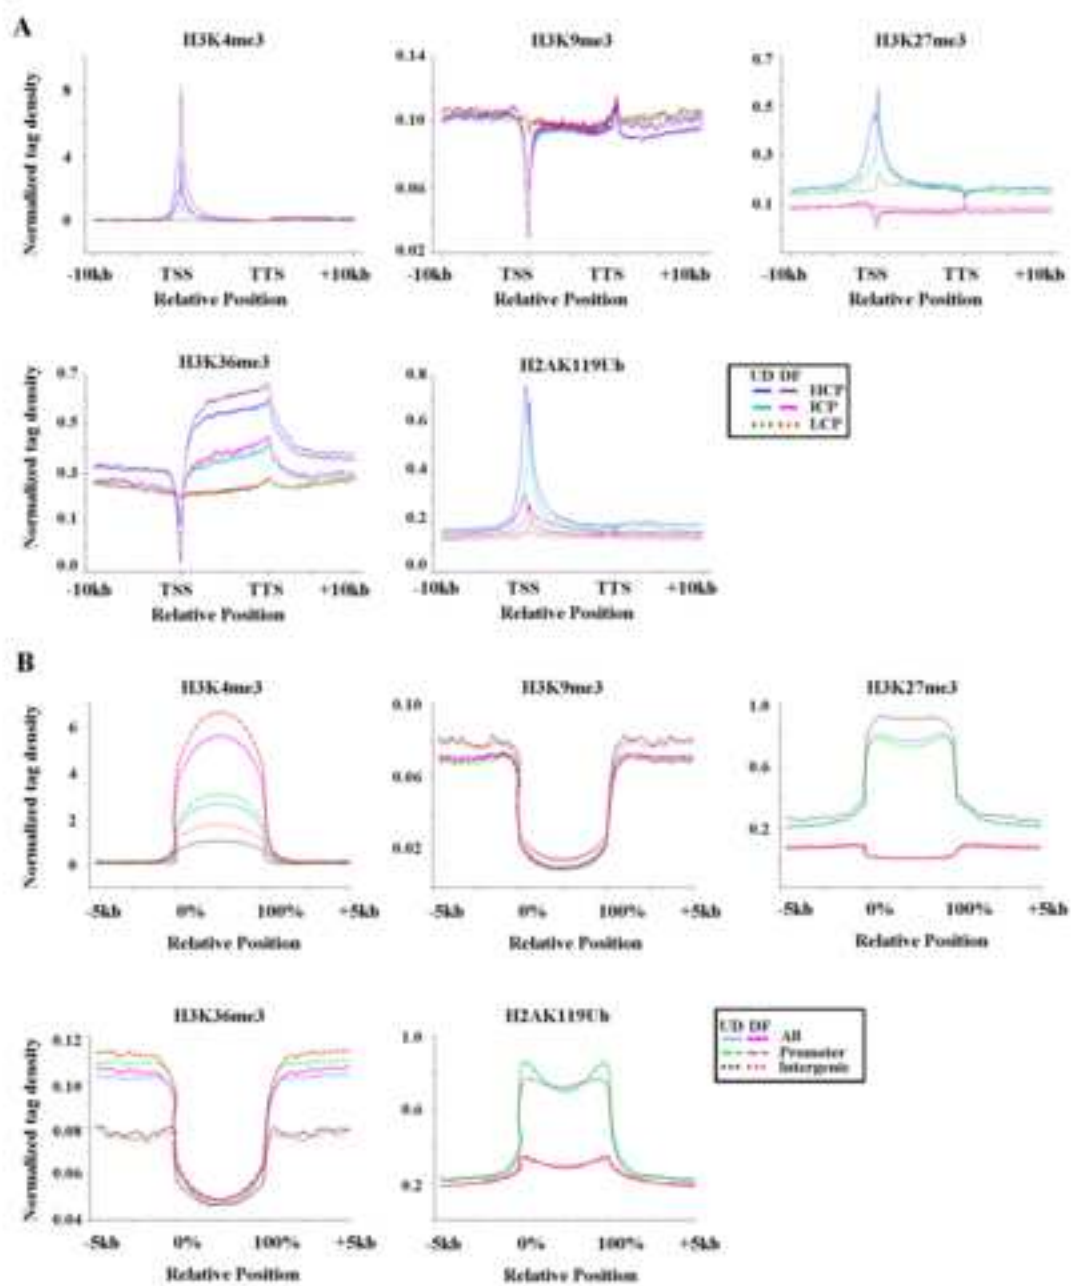

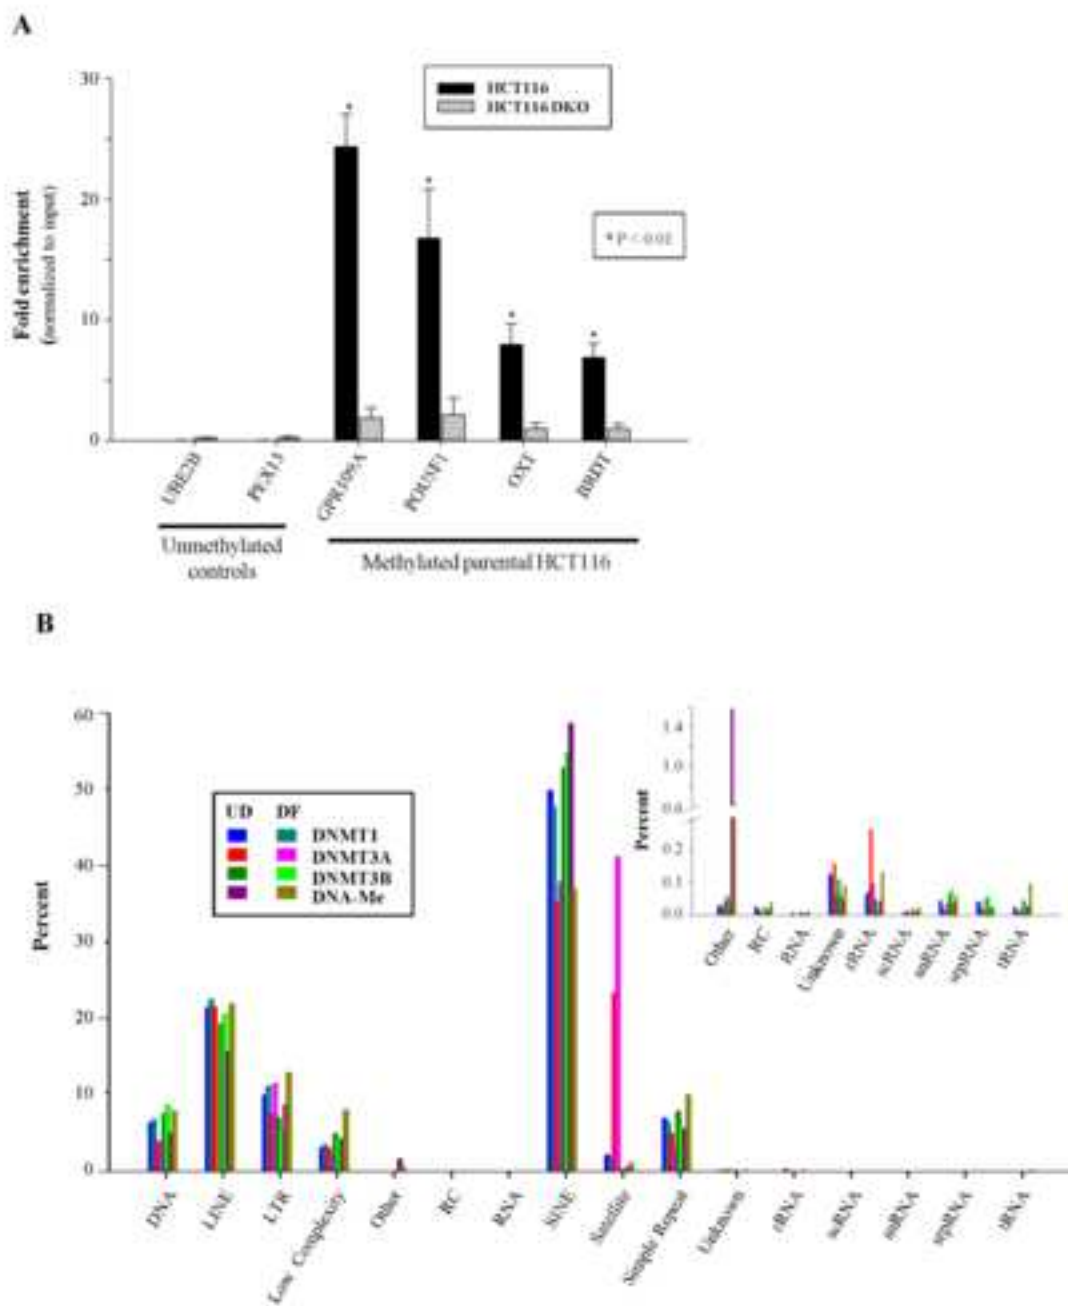

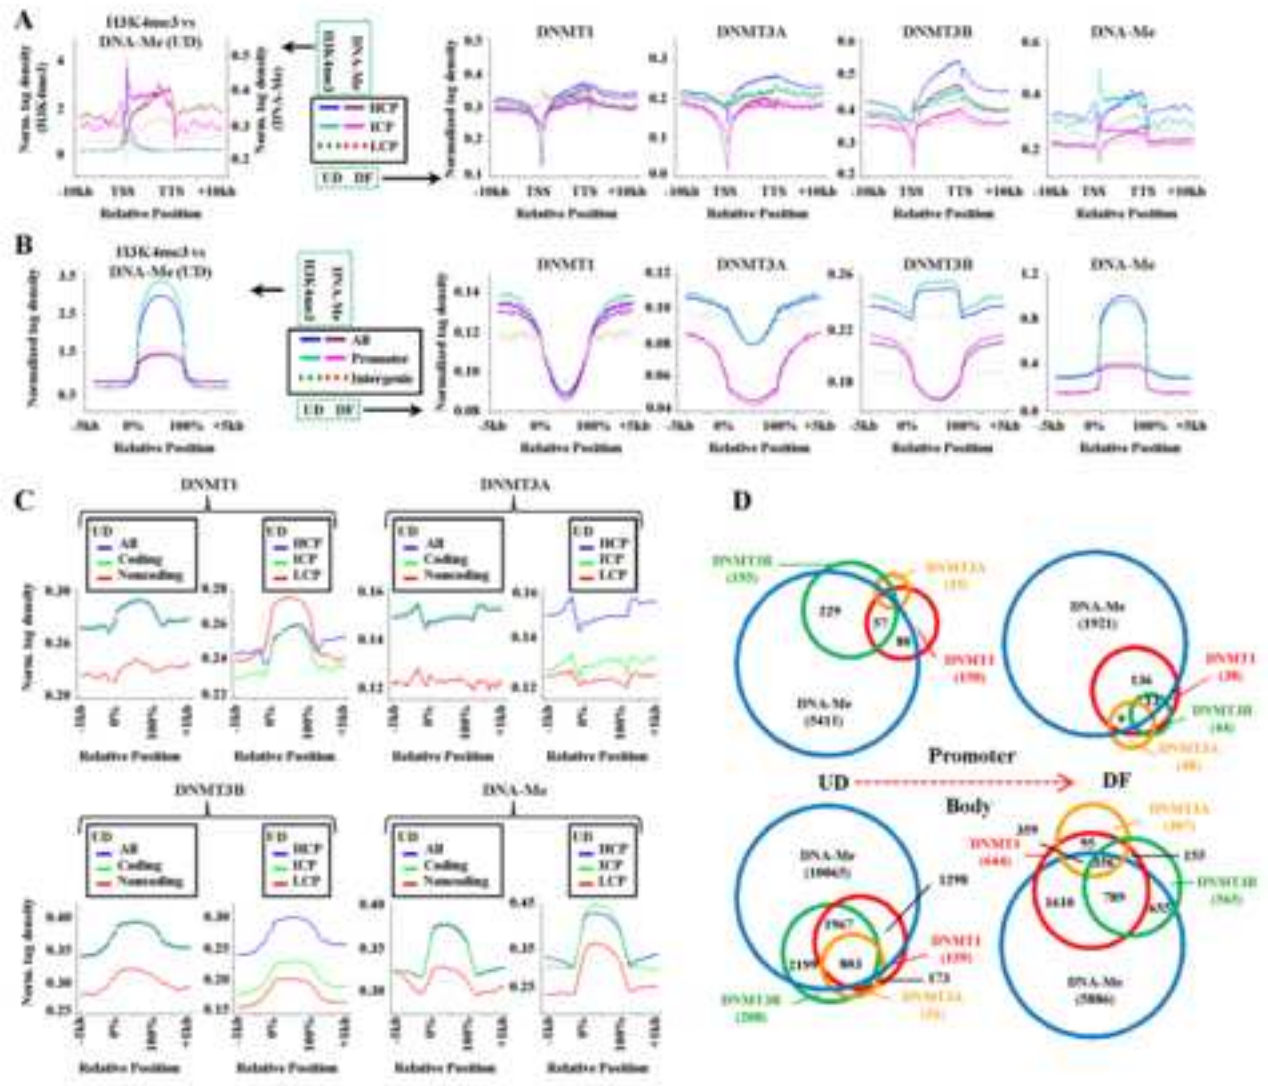



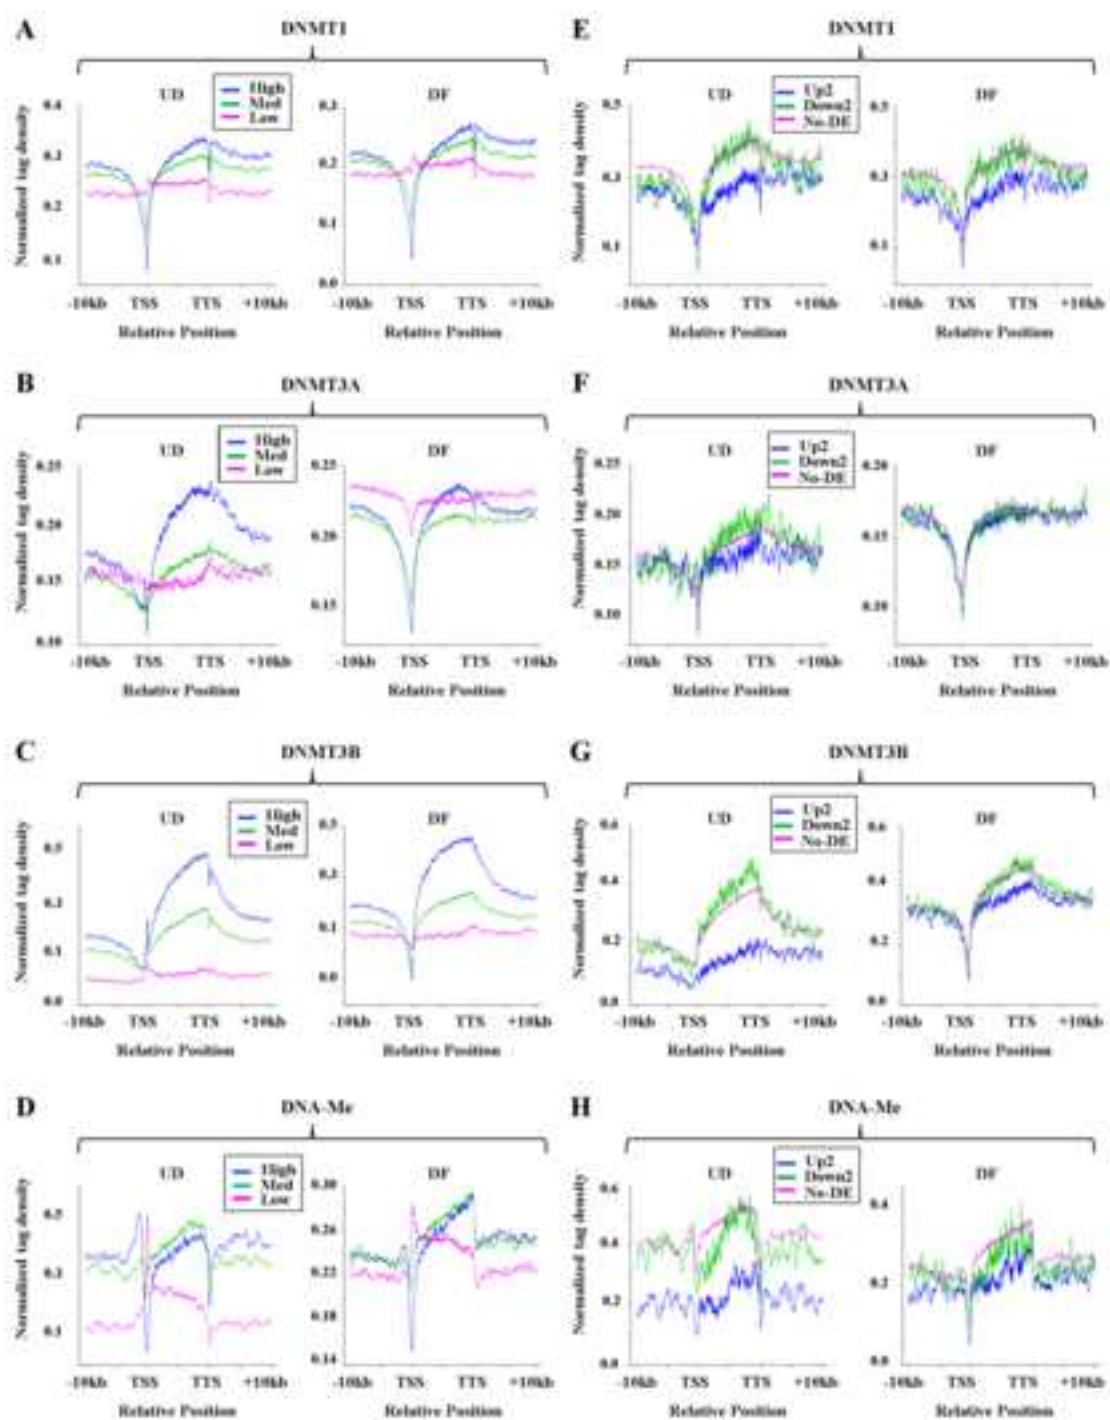

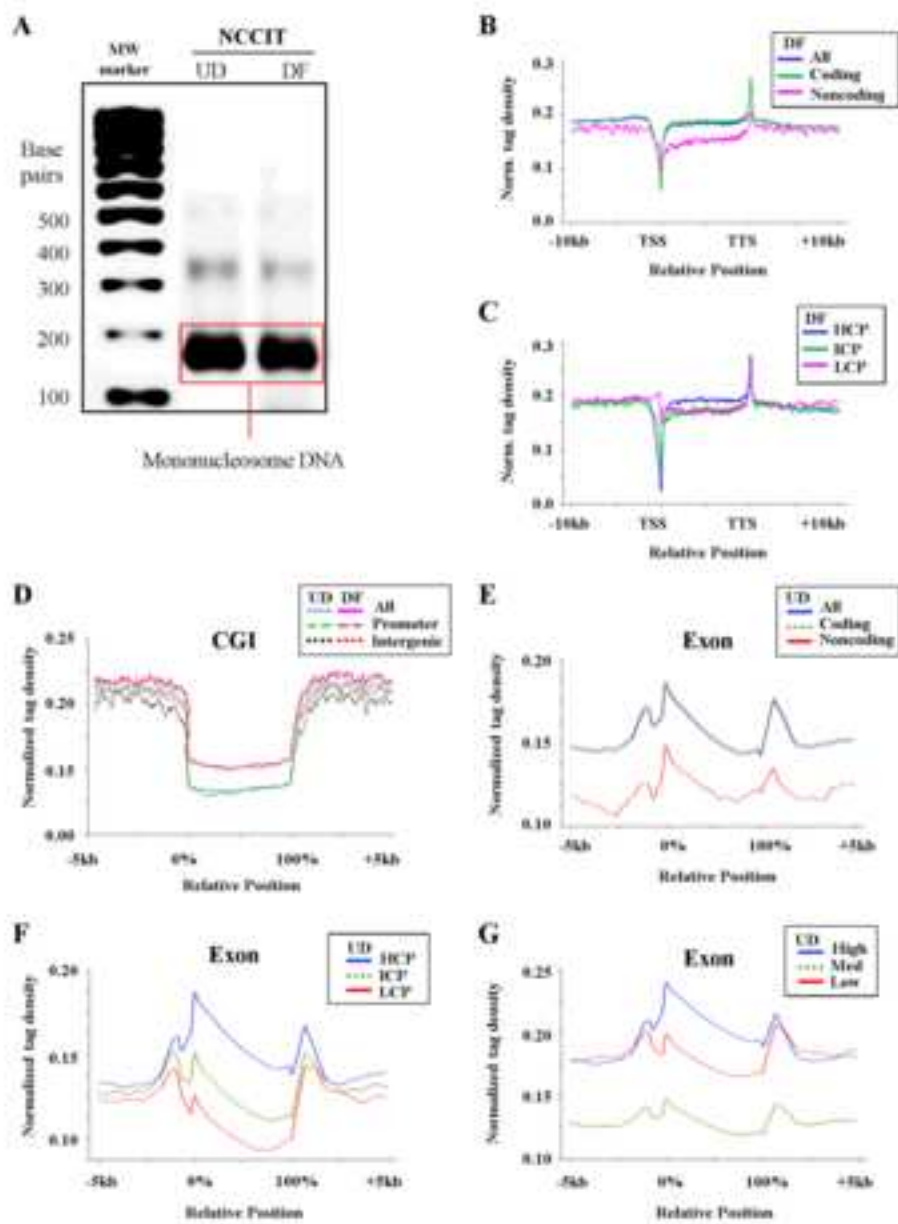

Supplement: NIHMS418967-supplement-02.pdf [file NIHMS418967-supplement-02.pdf]
